# Supplementary material
Source: PubMed Central journal article supplement (PMC1693951)
Supplement: plntcell_tpc.106.042770_1.pdf [file plntcell_tpc.106.042770_1.pdf]

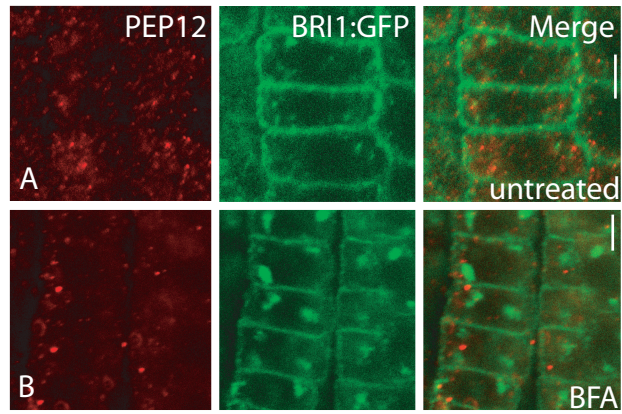

Supl. Figure 1

PVC marker PEP12 does not co-localise with endosomal marker in Arabidopsis. Non overlapping endomembranes of BRI1:GFP (green) and PEP12 (red) in untreated (A) and BFA treated (B) seedlings. Scale bars, 10 $\mu$ m.
