# Supplementary material
Source: PubMed Central journal article supplement (PMC1693951)
Supplement: plntcell_tpc.106.042770_2.pdf [file plntcell_tpc.106.042770_2.pdf]

**A**

| Markers              | Percentage of overlaying pixels     |                                     |
|----------------------|-------------------------------------|-------------------------------------|
| <b>PEP12/AUX1</b>    | PEP12 with AUX1<br>3,8 +/- 5,2%     | AUX1 with PEP12<br>2,1 +/- 3,3%     |
| <b>ST:YFP/AUX1</b>   | ST:YFP with AUX1<br>45,8 +/- 8,8%   | AUX1 with ST:YFP<br>33,8 +/- 4%     |
| <b>BRI1:GFP/AUX1</b> | BRI1:GFP with AUX1<br>25,5 +/- 3,7% | AUX1 with BRI1:GFP<br>30,1 +/- 9,2% |

**B**

| Markers                             | Percentage of overlaying pixels        |                                          |
|-------------------------------------|----------------------------------------|------------------------------------------|
| <b>PIN1/AUX1</b>                    | PIN1 with AUX1<br>80,7 +/- 4,1%        | AUX1 with PIN1<br>34 +/- 7,6%            |
| <b>ARF1/AUX1</b>                    | ARF1 with AUX1<br>81,8 +/- 8,9%        | AUX1 with ARF1<br>36,6 +/- 9,7%          |
| <b>BRI1/AUX1</b>                    | BRI1 with AUX1<br>80,6 +/- 7,9%        | AUX1 with BRI1<br>36,9 +/- 9,5%          |
| <b><math>\gamma</math>COP /AUX1</b> | $\gamma$ COP with AUX1<br>81 +/- 10,2% | AUX1 with $\gamma$ COP<br>47,2 +/- 11,6% |

Supl. Figure 2

Merged intracellular pixel percentages are indicated for AUX1 and subcellular marker in untreated (A) and BFA treated (B) protophloem cells (n=6).
