# Supplementary material
Source: PubMed Central journal article supplement (PMC1693951)
Supplement: plntcell_tpc.106.042770_3.pdf [file plntcell_tpc.106.042770_3.pdf]

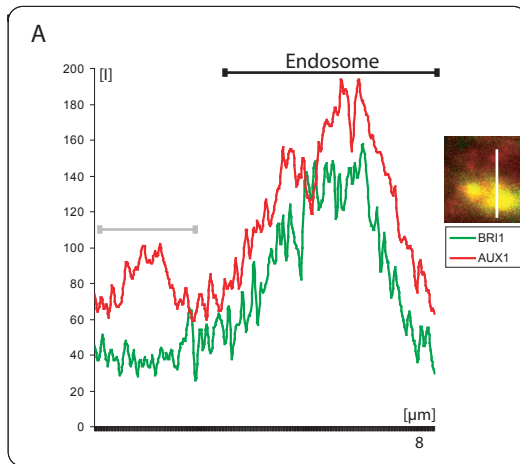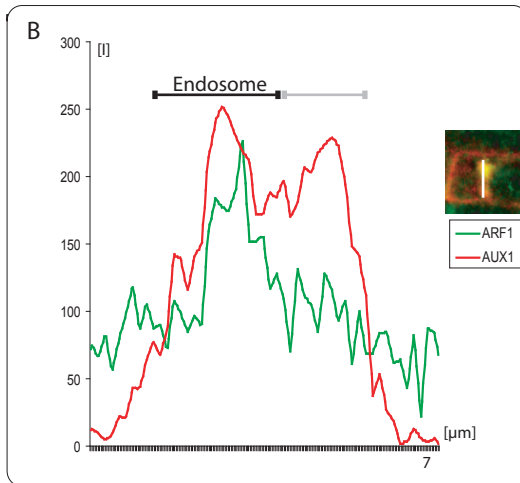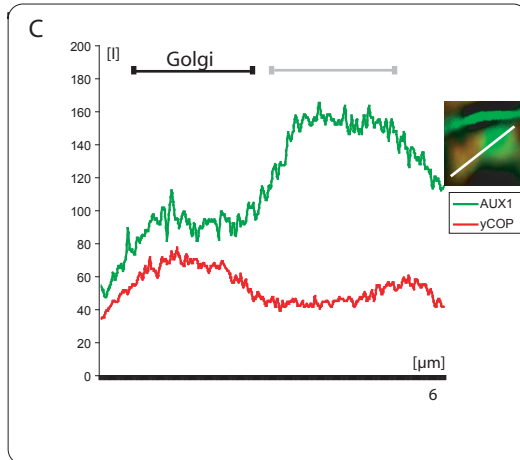

Supl. Figure 3  
Intensity profile analysis AUX1 and sub-cellular markers BRI1 (A), ARF1 (B) and gamma-COP (C) in BFA compartments reveals overlapping endosomal and GA derived structures of AUX1.
