# Supplementary material
Source: PubMed Central journal article supplement (PMC1693951)
Supplement: plntcell_tpc.106.042770_4.pdf [file plntcell_tpc.106.042770_4.pdf]

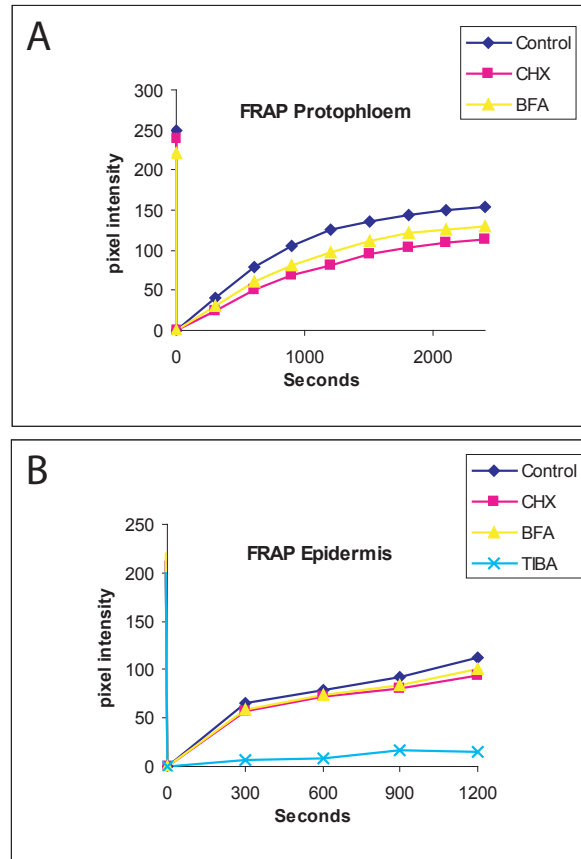

Supl. Figure 4  
 FRAP charts of AUX1 dynamics in proto-  
 phloem (A) and epidermal cells (B) showing  
 time dependency of AUX1 recovery at the  
 PM.
