# Supplementary material
Source: PubMed Central journal article supplement (PMC1693951)
Supplement: plntcell_tpc.106.042770_5.pdf [file plntcell_tpc.106.042770_5.pdf]

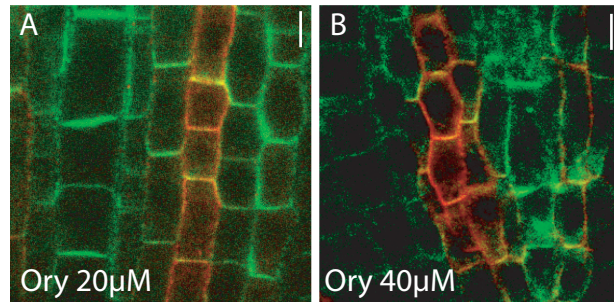

Supl. Figure 5

Oryzalin (20 $\mu$ M, 3 hours) treatments (A) do not interfere with AUX1/PIN1 targeting. However, higher Oryzalin concentrations (40 $\mu$ M, 3 hours) lead to changes in cell morphology and AUX1/PIN1 localisation
