# Supplementary material
Source: PubMed Central journal article supplement (PMC1693951)
Supplement: plntcell_tpc.106.042770_6.pdf [file plntcell_tpc.106.042770_6.pdf]

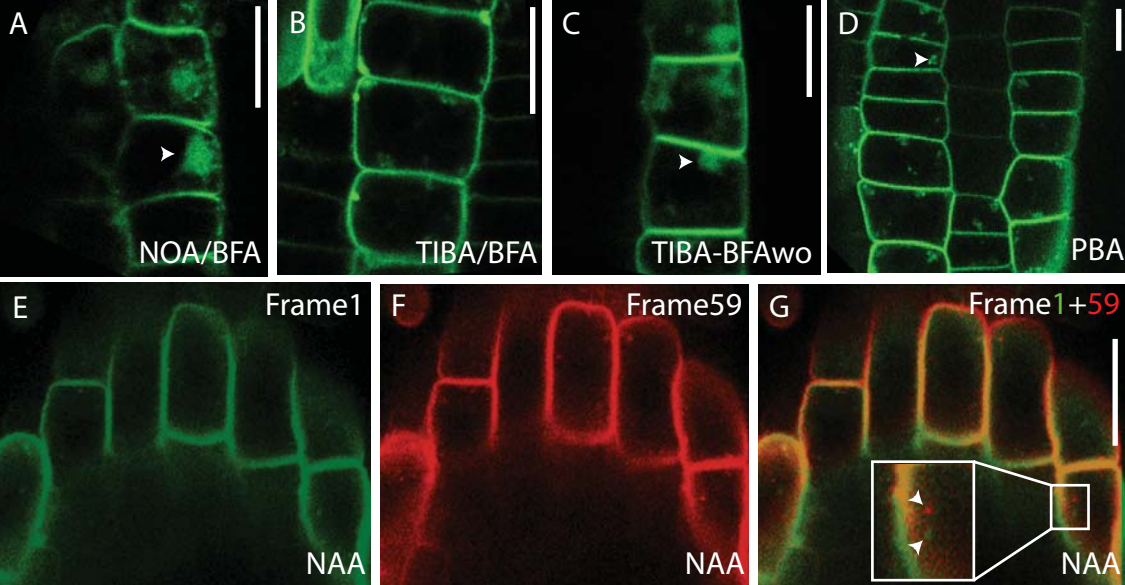

Figure S6:

(A) NOA does not interfere with AUX1:YFP accumulation in BFA compartments (see arrowhead).

(B) TIBA blocks AUX1 accumulation in BFA compartment.

(C) Removal of BFA in presence of TIBA inhibits redistribution of AUX1:YFP (see arrowhead; compare to Fig. 4A)

(D) PBA treatments show AUX1:YFP accumulations (see arrowhead).

(E-G) Auxin does not interfere with AUX1:YFP dynamics (see inset and arrowheads). Overlay of frame1 (E) and frame59 (F).

Live cell imaging of AUX1:YFP in epidermis (A-D) and lateral rootcap cells (E-F); Scale bars, 10 μm.
