# Supplementary material
Source: PubMed Central journal article supplement (PMC1693951)
Supplement: plntcell_tpc.106.042770_7.pdf [file plntcell_tpc.106.042770_7.pdf]

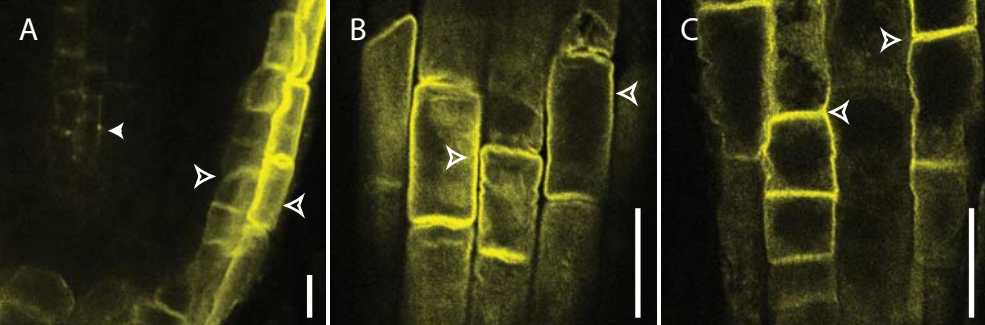

Figure S7:

(A) Filipin treated roots display AUX1:YFP miss localisation in proto-phloem- (filled arrowhead), but not in lateral root cap- (B) or epidermis cells (C) (empty arrowheads).

Live cell immaging of root cells; Scale bars, 10 $\mu$ M.
